# Supplementary material for: Cobalt and nitrogen co-doped Ni3S2 nanoflowers on nickel foam as high-efficiency electrocatalysts for overall water splitting in alkaline media
Source: Royal Society of Chemistry journal article supplement (doi:10.1039/d1dt01214b), 2021-01-01
Supplement: d1dt01214b1.pdf [file d1dt01214b1.pdf]

## Cobalt and nitrogen co-doped Ni<sub>3</sub>S<sub>2</sub> nanoflowers on nickel foam as high-efficiency electrocatalysts for overall water splitting in alkaline media

Xiaoqiang Du<sup>a\*</sup>, Guangyu Ma<sup>a</sup> and Xiaoshuang Zhang<sup>b</sup>

a. School of Chemical Engineering and Technology, North University of China, Taiyuan 030051, People's Republic of China. E-mail: 20160053@nuc.edu.cn

b. School of Science, North University of China, Taiyuan 030051, People's Republic of China.

### DFT calculation

In this study, the Cambridge Serial Total Energy Package module of Materials Studio was used for DFT calculation. The interactions of electrons were calculated by the generalized gradient approximation functions of Perdew-Burke-Ernzerh (GGA-PBE). The (010) plane optimal structures of Ni<sub>3</sub>S<sub>2</sub>/NF, Co-Ni<sub>3</sub>S<sub>2</sub>/NF, N-Ni<sub>3</sub>S<sub>2</sub>/NF and Co-N-Ni<sub>3</sub>S<sub>2</sub>/NF were calculated by setting a cutoff energy of 480 eV and 8×8×1 k-points grid. The structures were also optimized for energy and force convergence choosing as 2.0×10<sup>-5</sup> eV/atom and 0.05 eV/Å, respectively. The vacuum space was up to 0.002 Å to eliminate periodic interactions.

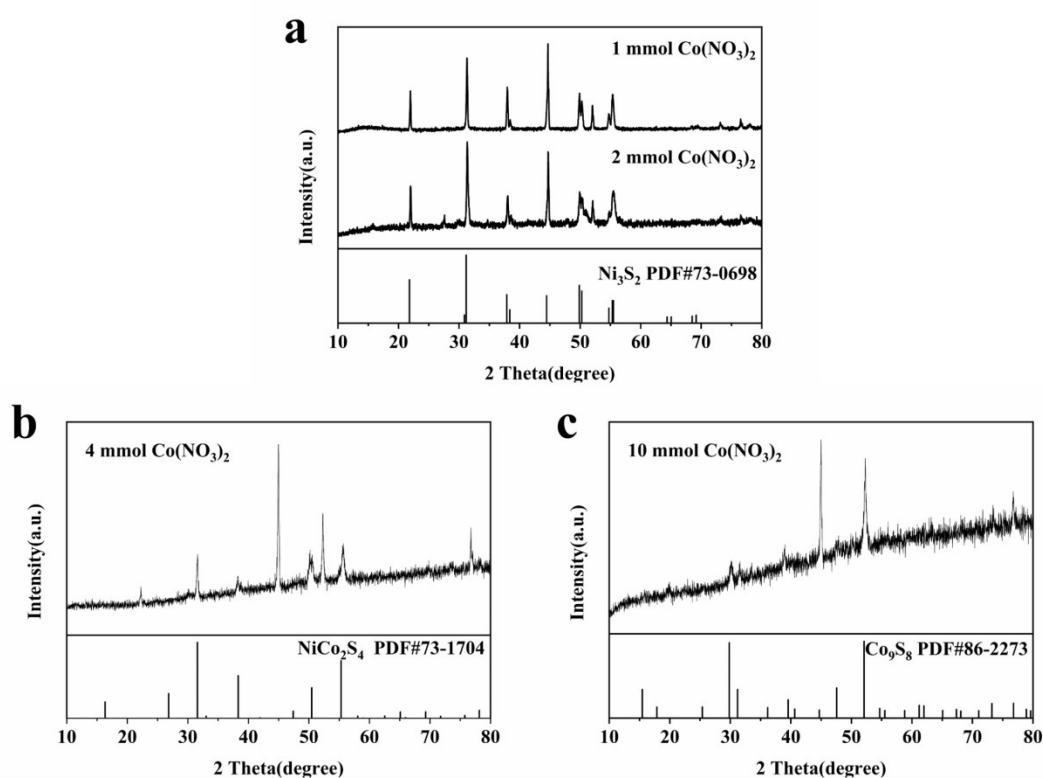

**Fig. S1** XRD patterns of different cobalt contents for resulting materials (a) 1 mmol and 2 mmol Co(NO<sub>3</sub>)<sub>2</sub>·6H<sub>2</sub>O; (b) 4 mmol Co(NO<sub>3</sub>)<sub>2</sub>·6H<sub>2</sub>O and (c) 10 mmol Co(NO<sub>3</sub>)<sub>2</sub>·6H<sub>2</sub>O.

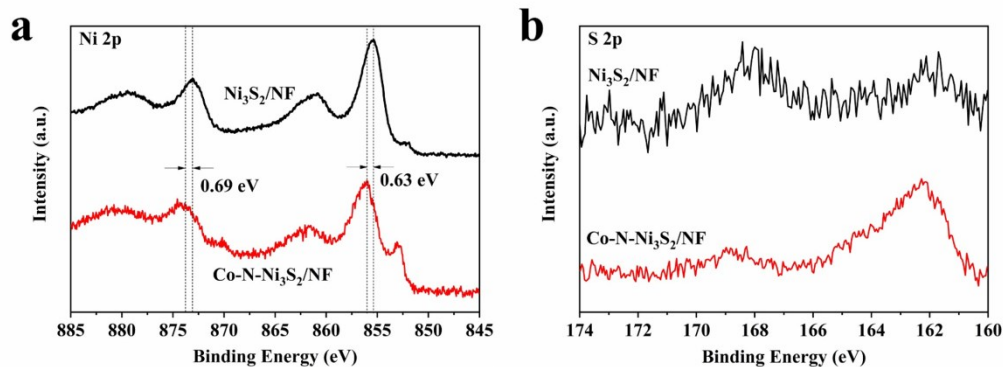

**Fig. S2** High resolution XPS spectra (a) Ni 2p and (b) S 2p for  $\text{Ni}_3\text{S}_2/\text{NF}$  and  $\text{Co-N-Ni}_3\text{S}_2/\text{NF}$ , respectively.

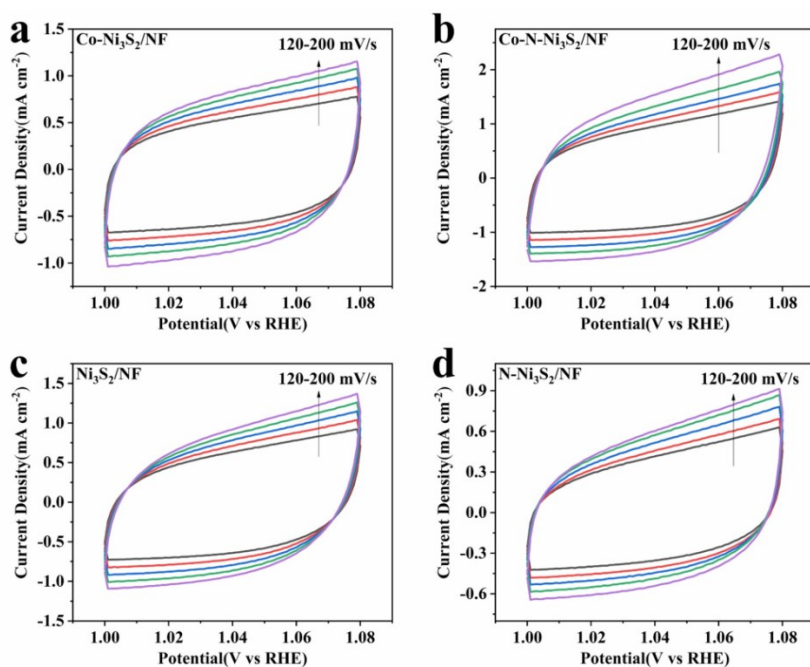

**Fig. S3** The cyclic voltammetric curves of the catalyst at scanning speeds of 120, 140, 160, 180, 200 mV/s when the catalyst was used as an anode. (a)  $\text{Co-Ni}_3\text{S}_2/\text{NF}$ , (b)  $\text{Co-N-Ni}_3\text{S}_2/\text{NF}$ , (c)  $\text{Ni}_3\text{S}_2/\text{NF}$  and (d)  $\text{N-Ni}_3\text{S}_2/\text{NF}$ .

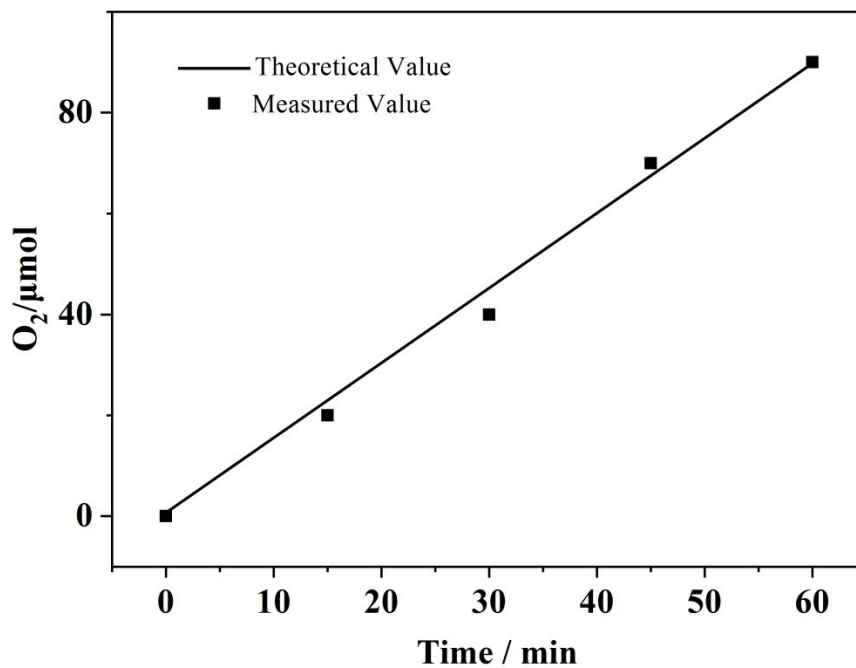

**Fig. S4** Electrocatalytic efficiency of  $O_2$  production over Co-N- $Ni_3S_2$ /NF.

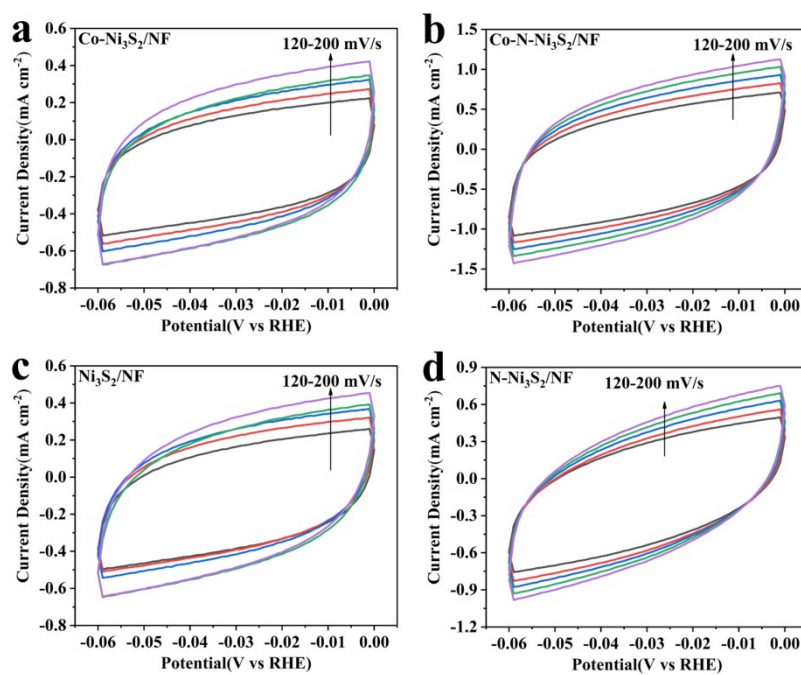

**Fig. S5** The cyclic voltammetric curves of the catalyst at scanning speeds of 120, 140, 160, 180, 200 mV/s when the catalyst was used as a cathode. (a)Co- $Ni_3S_2$ /NF, (b) Co-N- $Ni_3S_2$ /NF, (c)  $Ni_3S_2$ /NF and (d) N- $Ni_3S_2$ /NF.

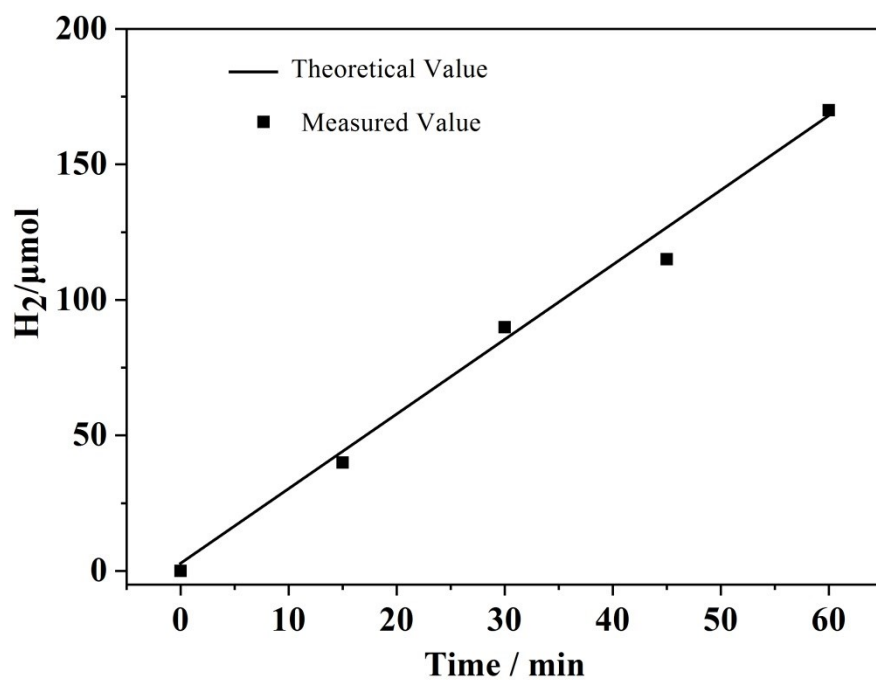

**Fig. S6** Electrocatalytic efficiency of H<sub>2</sub> production over Co-N-Ni<sub>3</sub>S<sub>2</sub>/NF.

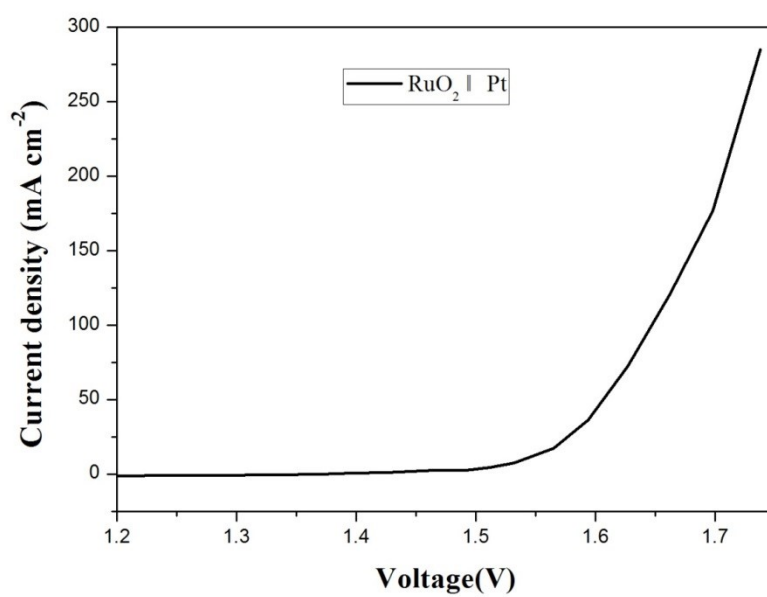

**Fig. S7** Polarization curve of the RuO<sub>2</sub> and Pt for water splitting with a scan rate of 5 mV s<sup>-1</sup> in 1 M KOH.

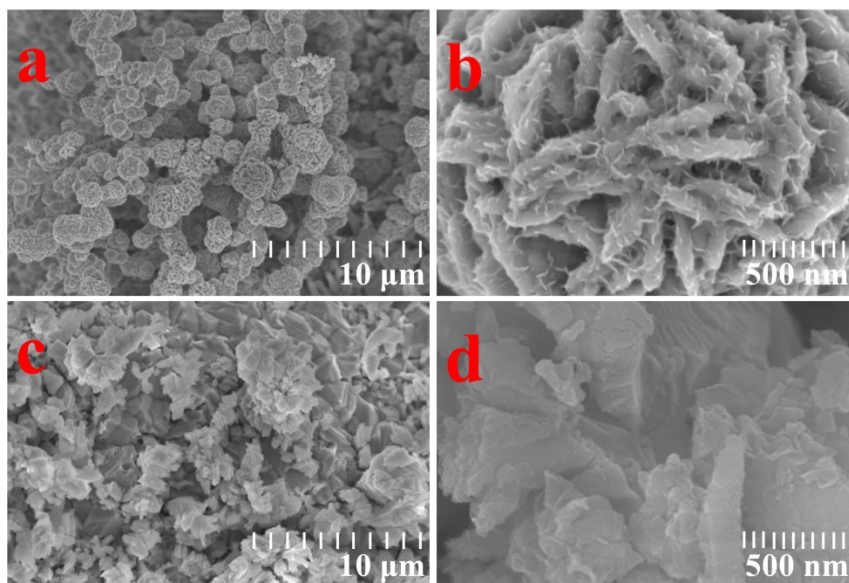

**Fig. S8** SEM image of fresh(a,b) and recovered(c,d) Co-N-Ni<sub>3</sub>S<sub>2</sub>/NF (after 12 h tests).

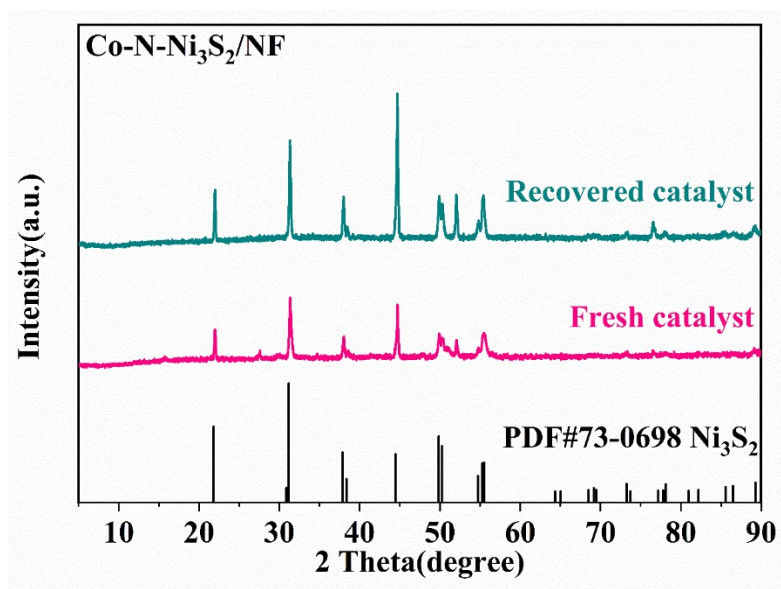

**Fig. S9** XRD patterns of Co-N-Ni<sub>3</sub>S<sub>2</sub>/NF before and after stability test (after 12 h tests).

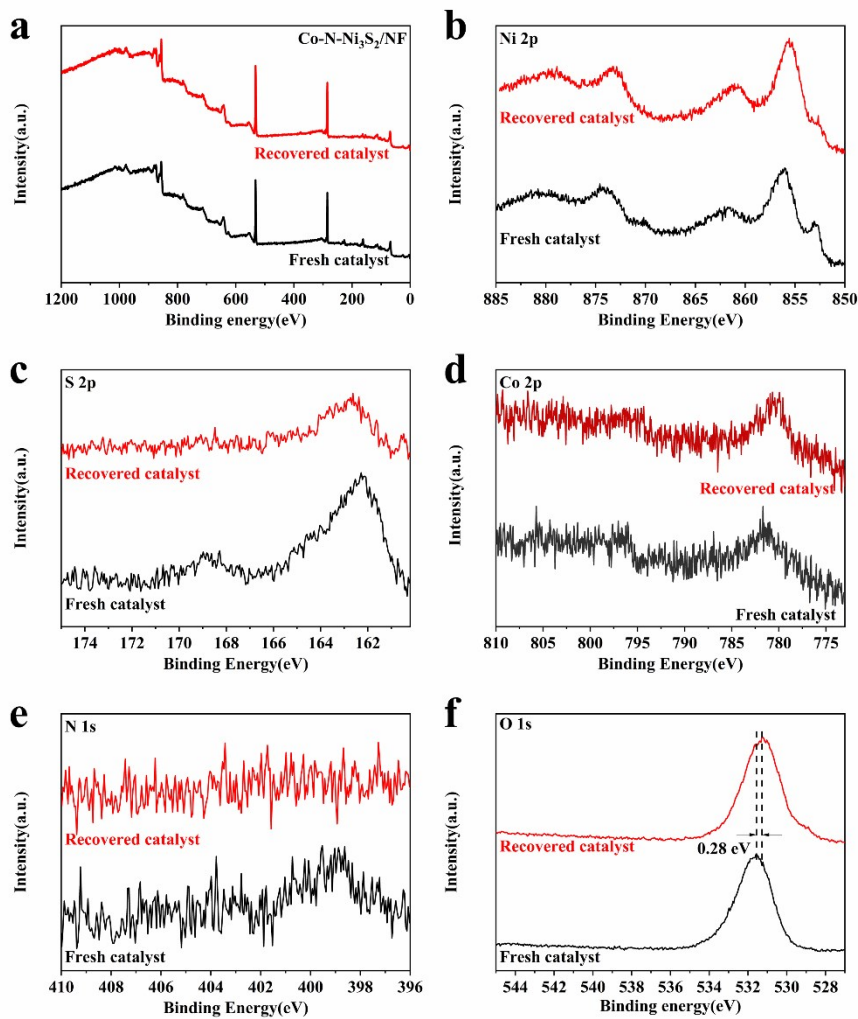

**Fig. S10** (a) XPS survey spectra, (b) Ni 2p, (c) S 2p, (d) Co 2p, (e) N 1s and (f) O 1s high resolution XPS spectra of fresh and recovered Co-N-Ni<sub>3</sub>S<sub>2</sub>/NF, respectively (after 12 h tests).

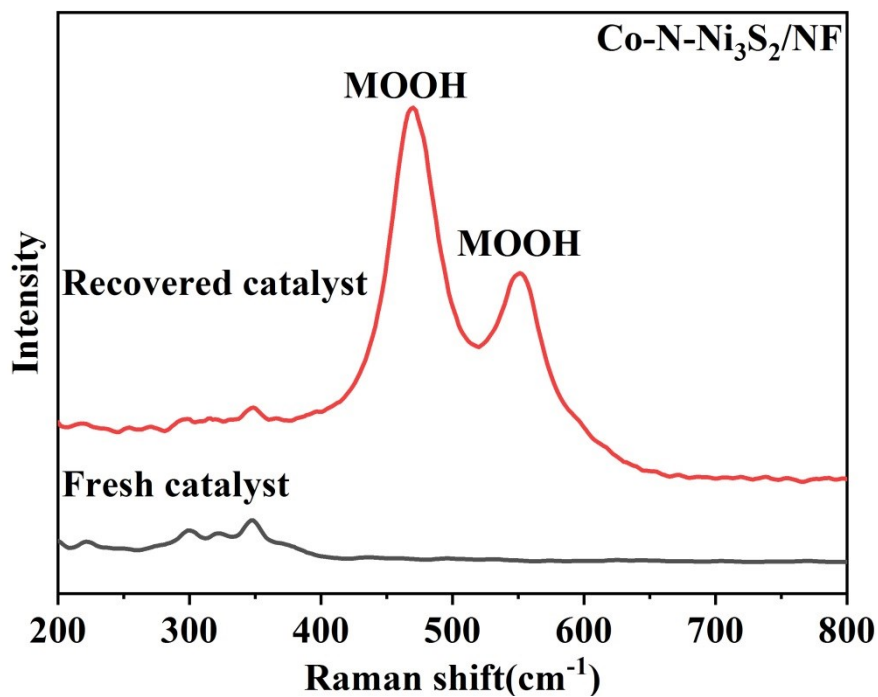

Fig. S11 Raman of fresh and recovered Co-N-Ni<sub>3</sub>S<sub>2</sub>/NF for OER reaction.

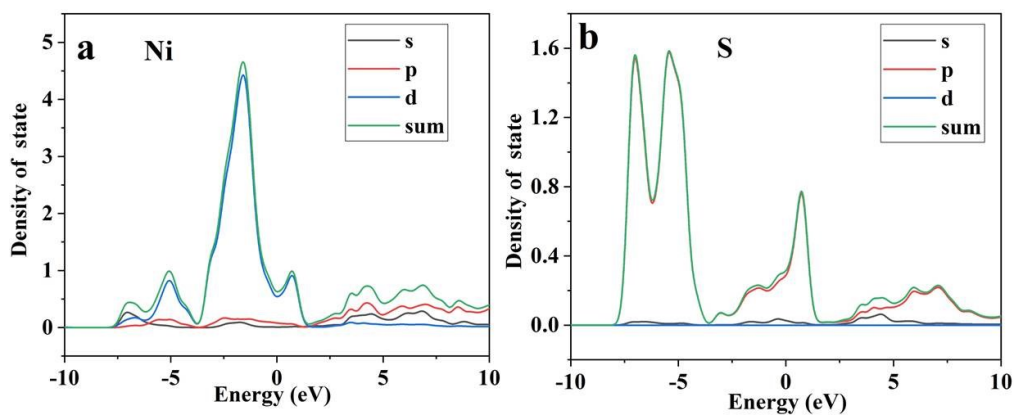

Fig. S12 Density of states for Ni<sub>3</sub>S<sub>2</sub>, (a) Ni and (b) S.

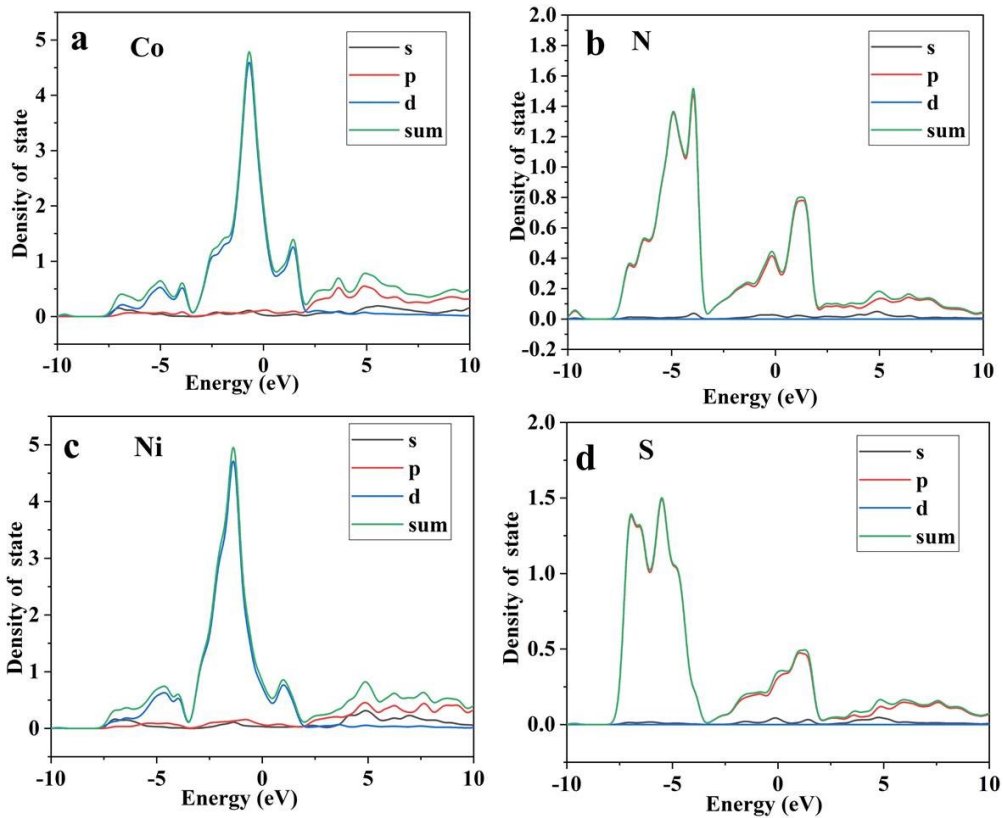

Fig. S13 Density of states for Co-N-Ni<sub>3</sub>S<sub>2</sub>, (a) Co, (b)N, (c) Ni and (d) S.

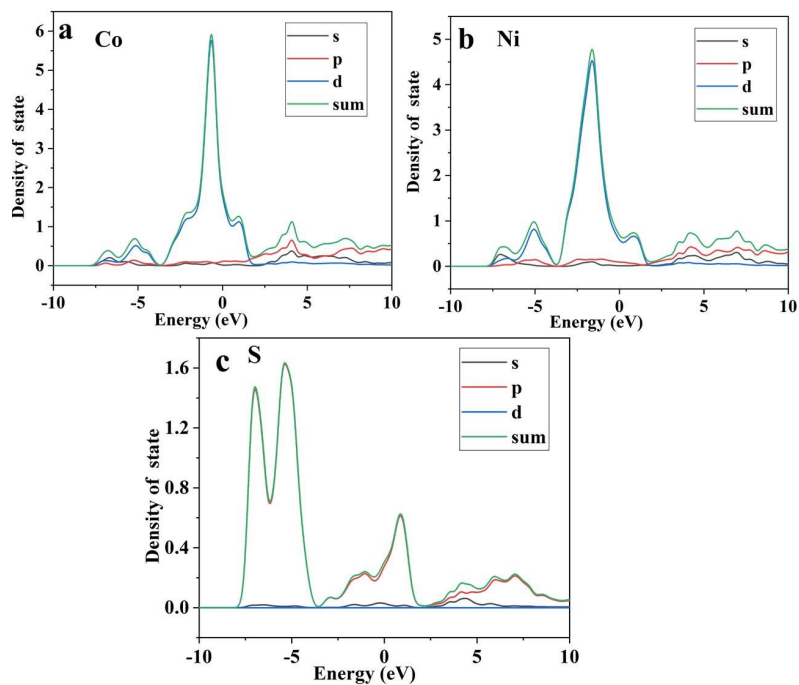

Fig. S14 Density of states for Co-Ni<sub>3</sub>S<sub>2</sub>, (a) Co, (b) Ni and (c) S.



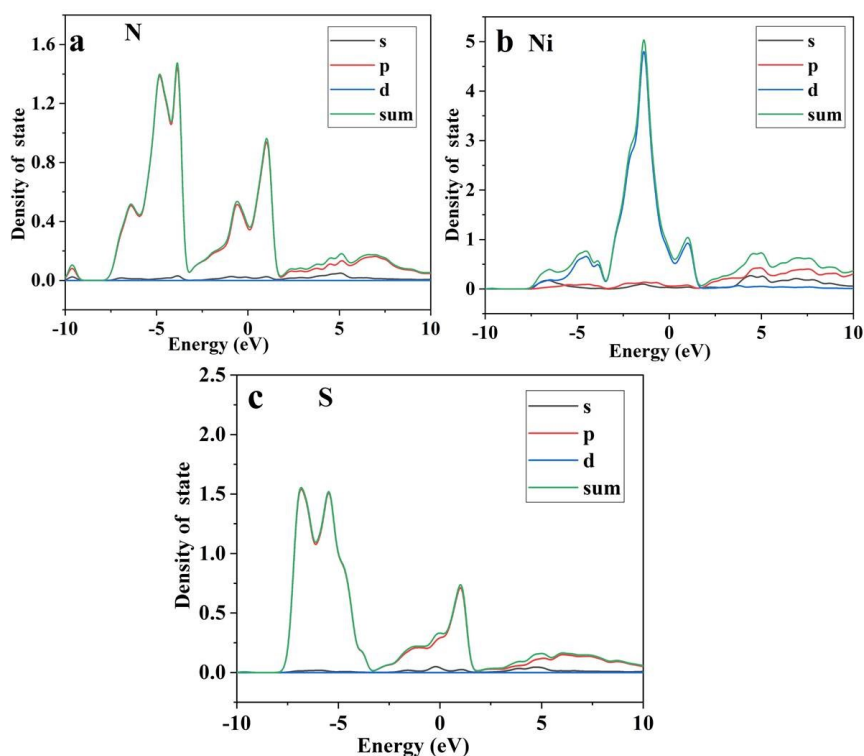

**Fig. S15** Density of states for N-Ni<sub>3</sub>S<sub>2</sub>, (a) N, (b) Ni and (c) S.

**Table S1.** Overall water splitting performances of Co-N-Ni<sub>3</sub>S<sub>2</sub>/NF and other reported electrocatalysts in alkaline media. (1 M KOH).

| Catalyst                                    | $\eta_{10}$<br>( $j = -10 \text{ mA/cm}^2$ ) | electrolyte | Ref.      |
|---------------------------------------------|----------------------------------------------|-------------|-----------|
| Co-N-Ni <sub>3</sub> S <sub>2</sub> /NF     | 1.50 V                                       | 1 M KOH     | This work |
| NiMoPO <sub>x</sub>                         | 1.55 V                                       | 1 M KOH     | 1         |
| Co <sub>0.75</sub> Ni <sub>0.25</sub> Se/NF | 1.60 V                                       | 1 M KOH     | 2         |
| Mo-Ni <sub>3</sub> S <sub>2</sub>           | 1.66 V                                       | 1 M KOH     | 3         |
| Co <sub>2</sub> P/EG                        | 1.67 V                                       | 1 M KOH     | 4         |
| CoSe                                        | 1.77 V                                       | 1 M KOH     | 5         |

## Reference

1. F. Kong, L. Sun, L. Huo and H. Zhao, *J. Power Sources*, 2019, **430**, 218-227.
2. S. Liu, Y. Jiang, M. Yang, M. Zhang, Q. Guo, W. Shen, R. He and M. Li, *Nanoscale*, 2019, **11**, 7959-7966.
3. C. Wu, B. Liu, J. Wang, Y. Su, H. Yan, C. Ng, C. Li and J. Wei, *Appl. Surf. Sci.*, 2018, **441**, 1024-1033.
4. H. Liu, D. Liu, M. Gu, Z. Zhao, D. Chen, P. Cui, L. Xu and J. Yang, *Mater. Today Energy*, 2019, **14**, 100336.
5. X. Li, L. Zhang, M. Huang, S. Wang, X. Li and H. Zhu, *J. Mater. Chem. A*, 2016, **4**, 14789-14795.
